# Supplementary material for: The Effects of Virtual Reality in Targeting Transdiagnostic Factors for Mental Health: A Systematic Review of the Literature
Source: MDPI journal article supplement (doi:10.3390/jcm11216463), 2022-10-31
Supplement: s1 [file s1]

## Supplementary materials

**Supplementary Table S1.** Characteristics, transdiagnostic factors considered and relevant outcomes of selected studies.

| Author                           | Age (M±SD, or range when mean not available)                                              | Gender                                                                                                                                          | Sample type (n)                                                                      | Transdiagnostic factor           | Study Design                                                                                                          | Follow-up | Measurement tool for considered transdiagnostic factors | VR technology type (software) | Relevant results                                                                                                                                                                                                                                                                                                                                                                                                                                                                     |
|----------------------------------|-------------------------------------------------------------------------------------------|-------------------------------------------------------------------------------------------------------------------------------------------------|--------------------------------------------------------------------------------------|----------------------------------|-----------------------------------------------------------------------------------------------------------------------|-----------|---------------------------------------------------------|-------------------------------|--------------------------------------------------------------------------------------------------------------------------------------------------------------------------------------------------------------------------------------------------------------------------------------------------------------------------------------------------------------------------------------------------------------------------------------------------------------------------------------|
| <b>Avoidance</b>                 |                                                                                           |                                                                                                                                                 |                                                                                      |                                  |                                                                                                                       |           |                                                         |                               |                                                                                                                                                                                                                                                                                                                                                                                                                                                                                      |
| Bouchard et al., 2017 [39]       | CBT + in virtual exposure (36.2±14.99); CBT + in vivo exposure (36.7±11.1); WL (30.6±9.1) | 43 females, 16 males<br>CBT + in virtual exposure (15 females, 2 males); CBT + in vivo exposure (17 females, 5 males); WL (11 females, 9 males) | Adults (59) with a diagnosis of SAD for at least the past 2 years.                   | Avoidance (Social Avoidance)     | Randomized Controlled Trial comparing: CBT + in virtual exposure (n=17) vs CBT + in vivo exposure (n=22) vs WL (n=20) | 6-months  | LSAS-SR                                                 | Immersive VR (Virtual Better) | VRE was considered more practical than IVE by therapists according to SWEAT scores (CBT+VRE: 15.24±3.96; CBT+IVE: 24.46±9.85; $t_{(22.83)} = 3.66$ , $p < .001$ ). VRE was better than IVE in reducing social anxiety and avoidance (LSAS-SR; CBT+VR: Pre = 85.1±29.5, post = 51.8±23.3; CBT +IVE: pre = 74.9±24.5, post = 56.0±26.9, $p < 0.05$ ) and social phobia (SPS; CBT + VR: pre = 39.0±16.1, post = 19.2±12.5; CBT + IVE: pre = 30.9±17.5, post = 22.4±15.7, $p < 0.001$ ). |
| Cárdenas-López et al., 2014 [40] | Females (36.5±14.4); Males (34.7±16.39)                                                   | 2 females; 7 males                                                                                                                              | City violence crime victims (9) undergoing VRET for PTSD (n=6) or VRET for ASD (n=3) | Avoidance (Cognitive Avoidance)  | Uncontrolled clinical trial                                                                                           | No        | CAPS-Avoidance                                          | Immersive VR                  | All the participants undergoing VRET showed an improvement on PTSD symptoms after the 12 week program, including avoidance (CAPS Avoidance: pre 32.2±13.2; post 2.3±1.8, $p < 0.001$ ).                                                                                                                                                                                                                                                                                              |
| Czerniak et al., 2016 [41]       | 26, 50 and 51 years old                                                                   | 3 males                                                                                                                                         | Men suffering from panic attacks, phobias and fear of flying (n=3)                   | Avoidance (Behavioral Avoidance) | Multiple case studies                                                                                                 | No        | //                                                      | Immersive VR (CAREN)          | After VRET 1 patient stopped taking anxiety medication before boarding a plane, the second patients stated that almost two years after treatment had flown several times, finally the third patient did not fly after treatment                                                                                                                                                                                                                                                      |

|                           |                                                                              |                                                                                                                                |                                                                                                                     |                                        |                                                                                                                                                         |                                   |             |                           |                                                                                                                                                                                                                                                                                                                                                                                                                                                            |
|---------------------------|------------------------------------------------------------------------------|--------------------------------------------------------------------------------------------------------------------------------|---------------------------------------------------------------------------------------------------------------------|----------------------------------------|---------------------------------------------------------------------------------------------------------------------------------------------------------|-----------------------------------|-------------|---------------------------|------------------------------------------------------------------------------------------------------------------------------------------------------------------------------------------------------------------------------------------------------------------------------------------------------------------------------------------------------------------------------------------------------------------------------------------------------------|
| Farrell et al., 2020 [42] | 10.25±2.11                                                                   | 4 females, 4 males                                                                                                             | Children with specific phobias (dogs) (8)                                                                           | Avoidance (Behavioral Avoidance)       | Multiple case studies                                                                                                                                   | 1-month                           | BAT         | Immersive VR              | Behavioural avoidance lowered from pre to post-treatment ( $Z = -2.21$ , $p = .02$ ) and from pre-treatment and a month follow up ( $Z = -2.38$ , $p = .008$ ). Post-treatment results were maintained at follow-up ( $p = .50$ ).                                                                                                                                                                                                                         |
| Freeman et al., 2022 [43] | gameChange VR therapy + usual care (36.6±12.8); usual care alone (37.8±12.2) | 111 females, 231 males<br>gameChange VR therapy + usual care (58 females, 116 males); usual care alone (53 females, 115 males) | Adults with psychosis or affective disorder diagnosis with psychotic symptoms presenting agoraphobic symptoms (346) | Avoidance (Agoraphobic Avoidance)      | Multicentre, parallel-group, single-blind randomized controlled trial comparing: gameChange VR therapy + usual care (n=174) vs usual care alone (n=172) | 6 weeks                           | O-AS; O-BAT | Immersive VR (gameChange) | Compared with the usual care alone group, the VR group significantly reduced agoraphobic avoidance (O-AS adjusted mean difference = $-0.47$ , $p=.026$ ; O-BAT adjusted mean difference = $0.89$ , $p=.0004$ ) at 6 weeks.                                                                                                                                                                                                                                 |
| Gujjar et al., 2018 [44]  | n.a.                                                                         | n.a.                                                                                                                           | Adults with dental phobia (10)                                                                                      | Avoidance (Behavioral Avoidance)       | Uncontrolled clinical trial                                                                                                                             | 6-months (but not for BAT scores) | BAT         | Immersive VR              | VRET was able to decrease the behavioral avoidance between pre and post-intervention (BAT: pre = $41.2\pm5.5$ ; post = $12.8\pm7.5$ , $d = 4.2$ , $p < 0.05$ )                                                                                                                                                                                                                                                                                             |
| Gujjar et al., 2019 [45]  | VRET (25.3±8.6); IP (23±8.9)                                                 | 18 males, 12 females<br>VRET (8 females, 7 males); IP (10 females, 5 males)                                                    | Adults with dental phobia (30)                                                                                      | Avoidance (Behavioral Avoidance)       | Randomized controlled trial comparing VRET (n=15) vs IP (n=15) group                                                                                    | 6-months (but not for BAT scores) | BAT         | Immersive VR              | VRET improved behavioral avoidance between pre and post-treatment (BAT: pre= $38.4\pm4.5$ , post= $21.8\pm8.0$ , $t_{(14)} = 8.09$ , $p < 0.01$ ; BAT steps: pre= $2.1\pm0.3$ , post= $3.5\pm0.6$ , $t_{(14)} = -7.36$ , $p < 0.001$ ), with better results when compared to the IP group at post-treatment (BAT: VRET= $38.4\pm4.5$ , IP= $33.4\pm2.8$ , $d = 1.33$ , $p<.05$ ; BAT steps: VRET= $21.8\pm8.0$ , IP= $32.7\pm2.2$ , $d = 1.86$ , $p<.05$ ) |
| Kampman et al., 2016 [46] | VRET (39.65±11.77); iVET (37.50±11.27); WL (33.50±11.44)                     | VRET group (65% females); iVET group (75% females); WL (50% females)                                                           | Adults with SAD (60).                                                                                               | Avoidance (Social Avoidance, Behaviora | Randomized controlled trial comparing: VRET (n=20) vs iVET (n=20) vs WL (n=20)                                                                          | 3-months                          | LSAS-SR     | Immersive VR              | Social avoidance and anxiety was reduced between pre and post treatment in both the iVET (LSAS-SR: pre= $69.15\pm19.44$ , post= $39.22\pm25.01$ , $p < .001$ , $d=1.14$ ) and the VRET group (LSAS-SR: pre= $73\pm17.25$ , post= $55.74\pm18.65$ , $p=.014$ ; $d=0.55$ ), with a greater decrease in iVET                                                                                                                                                  |

|                                       |                                                              |                                                                                    |                                                 |                                                   |                                                                                           |          |       |                               |                                                                                                                                                                                                                                                                                                                                                                                                                                                                      |
|---------------------------------------|--------------------------------------------------------------|------------------------------------------------------------------------------------|-------------------------------------------------|---------------------------------------------------|-------------------------------------------------------------------------------------------|----------|-------|-------------------------------|----------------------------------------------------------------------------------------------------------------------------------------------------------------------------------------------------------------------------------------------------------------------------------------------------------------------------------------------------------------------------------------------------------------------------------------------------------------------|
|                                       |                                                              |                                                                                    |                                                 | l<br>Avoidanc<br>e)                               |                                                                                           |          |       |                               | (p=.006). No significant differences were found between VRET and the waiting-list control group between pre and post-treatment (p=.197). Social avoidance slightly increased at 3-month follow-up for the VRET group (LSAS-SR: 57.89±23.60, d=0.55).<br><br>Behavioural avoidance improved for both VRET (p=.018; d = 0.56) and iVET (p = .002; d = 0.77) compared to the WL. No significant differences were found between VRET and iVET at postassessment (p=.920) |
| Kaussner et al., 2020 [47]            | 40.36±8.57                                                   | 5 males and 9 females                                                              | Adults with fear of driving (n = 14).           | Avoidanc<br>e<br>(Behavioral Avoidanc<br>e)       | Non-Randomized Controlled Study comparing: VRET (n=9) vs WL (n=4)                         | 12-weeks | BAT   | Non-immersi<br>ve VR (SILAB ) | VRET was useful to reduce avoidance and fear of driving, with all the participants completing one task that they avoided previously (Friedman test $\chi^2 = 14.85$ ; p = .002). 93% of patients maintained the results at follow-up.                                                                                                                                                                                                                                |
| Kim & Lee, 2019 [48]                  | VAAAT (22.36±2.31); Control/sham training Group (22.79±2.89) | VAAAT Group (8 males, 6 females); Control/sham training Group (9 males; 5 females) | Heavy social drinkers (28)                      | Avoidanc<br>e<br>(Alcohol-Approach Avoidanc<br>e) | Randomized Trial comparing: VAAAT (n=14) vs Control/sham training group (n=14)            | No       | A-IAT | Immersi<br>ve VR (VAAA T)     | In the VAAAT ( $t_{(13)} = 2.77$ , p < 0.05, d = 0.42), alcohol-approach avoidance increased, while it decreased in the control group ( $t_{(13)} = -4.38$ , p < 0.01, d = 0.78). However, the main effect of group [ $F_{(1,26)} = 0.01$ , p = 0.92] and time [ $F_{(1, 26)} = 1.05$ , p = 0.32] was not statistically significant.                                                                                                                                 |
| Kim et al., n.a. (range: 19-2020 [49] | (range: 19-30 years)                                         | n.a.                                                                               | Adults with SAD (52)                            | Avoidanc<br>e<br>(Social Avoidanc<br>e)           | Randomized Controlled Trial comparing: VR (n=24) vs WL (n=28)                             | 3-weeks  | LSAS  | Immersi<br>ve VR              | After VR treatment, LSAS total ( $F_{(1,39)} = 5.8$ , p = 0.02), anxiety ( $F_{(1,39)} = 6.9$ , p = 0.01) and social avoidance decreased ( $F_{(1,39)} = 4.7$ , p = 0.04). At follow-up anxiety and social avoidance lowered significantly ( $t_{20} = -3.8$ , p < 0.01; and $t_{20} = -3.2$ , p < 0.01, respectively). In the WL group, no significant changes in these scores were found.                                                                          |
| Malbos, Rapee & Kavakli, 2011 [50]    | n.a.                                                         | 8 females and 2 males                                                              | Adults with panic disorder and agoraphobia (10) | Avoidanc<br>e<br>(Behavioral Avoidanc<br>e)       | Randomized Controlled Trial comparing: VRET (n=n.a.) vs VRET + cognitive therapy (n=n.a.) | No       | BAT   | Immersi<br>ve VR              | Behavioral avoidance decreased in the VRET only group (BAT: pre=8.20±2.4; post=9.6±0.89, p < 0.025) with no significant difference with the VRET + cognitive therapy group (BAT: pre=5.0±3.19, post=7.8±2.68, p < 0.025).                                                                                                                                                                                                                                            |
| Malbos, Rapee &                       | 44.11±13.79                                                  | 12 females and 7 males                                                             | Adults with panic disorder                      | Avoidanc<br>e                                     | Randomized Controlled Trial                                                               | 3-months | BAT   | Immersi<br>ve VR              | Beavioral avoidance decreased both in the VRET only group (BAT: pre=9.0±2.0, post=9.78±0.67,                                                                                                                                                                                                                                                                                                                                                                         |

|                                 |                                            |                                                |                                                   |                                   |                                                                                     |           |            |              |                                                                                                                                                                                                                                                                                                                                                                                                                                                                                                                                                                                                                                                            |
|---------------------------------|--------------------------------------------|------------------------------------------------|---------------------------------------------------|-----------------------------------|-------------------------------------------------------------------------------------|-----------|------------|--------------|------------------------------------------------------------------------------------------------------------------------------------------------------------------------------------------------------------------------------------------------------------------------------------------------------------------------------------------------------------------------------------------------------------------------------------------------------------------------------------------------------------------------------------------------------------------------------------------------------------------------------------------------------------|
| Kavakli, 2013 [51]              |                                            |                                                | and agoraphobia (19).                             | (Behavioral Avoidance)            | comparing: VRET (n=n.a.) vs VRET Avoidance + cognitive therapy (n=n.a.)             |           |            |              | follow-up= 9.87±0.35, p <0.025) and in the VRET + cognitive therapy group (BAT: pre=7.22±3.19, post=8.78±2.22, follow-up=8.62±2.32, p <0.025), with maintenance of results at 3-months follow-up. No significant difference was found when adding cognitive therapy.                                                                                                                                                                                                                                                                                                                                                                                       |
| Maples-Keller et al., 2017 [52] | 34.74±8.35                                 | 141 males, 9 females                           | Iraq and/or Afghanistan veterans with PTSD (150)  | Avoidance (Behavioral Avoidance)  | Uncontrolled clinical trial (secondary analyses from a randomized controlled trial) | No        | PSS        | Immersive VR | According to three different measurements in different period of time, VR reduced behavioural avoidance symptoms between pre and post-intervention in the sample (t1 = 4.25±1.65); t2 = 3.56±2.07; t3 = 2.98±2.11); d = .77)                                                                                                                                                                                                                                                                                                                                                                                                                               |
| Meyerbroeker et al., 2013 [53]  | n.a. (range: 18-65 years)                  | n.a.                                           | Adults with panic disorder with agoraphobia (55). | Avoidance (Agoraphobic Avoidance) | Randomized controlled trial comparing: VRET (n=19) vs iVET (n=18) vs WL (n=18)      | No        | MI         | CAVE,        | No difference was found between VRET and iVET in improving agoraphobic avoidance (MI: $F_{(2, 27)} = 0.882$ , p = 0.425) and active treatments produced greater changes than WL ( $F_{(1, 33)} = 15.181$ , p = 0.000).                                                                                                                                                                                                                                                                                                                                                                                                                                     |
| Michalishyn et al., 2010 [54]   | 29.1±7.99                                  | 31 females and 1 male                          | Adults with specific phobia (spiders) (32).       | Avoidance (Behavioral avoidance)  | Randomized controlled clinical trial comparing: VRET (n=n.a.) vs iVET (n=n.a.)      | 3-months  | BAT, FSQ-F | Immersive VR | VRET produced a reduction in behavioral avoidance between pre and post-treatment (BAT: pre= 3.56±2.89; post=9.25±2.72, p<.001), with results maintained at follow-up (BAT=9.73±2.43). No significant difference was found between VRET and iVET for this variable ( $F_{(1, 24)} = 2.55$ , p = 0.12). Both iVET (FSQ-F: pre=103.28±13.13; post=47.88±14.07; follow-up=47.81±32.25) and VRET (FSQ-F: pre=104.61±9.59; post=54.37±22.46; follow-up=56.67±23.99) improved fear and avoidance of spiders at post-treatment and follow-up (time effect: $F_{(6, 28)}=17.12$ , p= 0.00), with no difference between treatments ( $F_{(1, 24)}=0.814$ , p=0.445). |
| Miloff et al., 2019 [55]        | OST group (34.04±9.85); VRET (34.06±10.92) | OST (8 males, 41 females and 1 other); VRET (8 | Adults with specific                              | Avoidance (Behavioral             | Randomized controlled trial comparing: one session treatment                        | 12-months | BAT        | Immersive VR | Behavioural avoidance improved at post-treatment in both OST (BAT: pre=5.66±2.47, post=10.70±1.68, $\beta = 4.84$ , 95% CI 4.15 to 5.52, d = 2.39) and VRET (BAT: pre=4.76±2.71,                                                                                                                                                                                                                                                                                                                                                                                                                                                                           |

|                                |                                      |                                                          |                                                            |                              |                                                                                |                     |                                    |                                  |  |                                                                                                                                                                                                                                                                                                                                                                                                                                                                                                                                                                                                                                                                                       |
|--------------------------------|--------------------------------------|----------------------------------------------------------|------------------------------------------------------------|------------------------------|--------------------------------------------------------------------------------|---------------------|------------------------------------|----------------------------------|--|---------------------------------------------------------------------------------------------------------------------------------------------------------------------------------------------------------------------------------------------------------------------------------------------------------------------------------------------------------------------------------------------------------------------------------------------------------------------------------------------------------------------------------------------------------------------------------------------------------------------------------------------------------------------------------------|
|                                |                                      | males, 42 females)                                       | phobia (spiders) (100).                                    | Avoidance                    | (n=50) vs VRET (n=50)                                                          |                     |                                    |                                  |  | post=8.50±2.29, $\beta = 3.55$ , 95% CI 2.87 to 4.23, $d = 1.49$ ) groups, but with significantly greater improvements in OST ( $\beta = -1.27$ , 95% CI -2.27 to -0.28, $p = .013$ ). The VRET group continued to experience significant improvements between post-treatment and 12-months follow-up (BAT=9.36±1.77) compared to the OST group (BAT=10.58±1.81) ( $\beta = 0.38$ , 95% CI .13 to .63, $p = .002$ ).                                                                                                                                                                                                                                                                  |
| Pot-Kolder et al., 2018 [56]   | VR-CBT (36.5±10); WL group (39.5±10) | VR-CBT (40 males, 18 females); WL (42 males, 16 females) | Adults with psychotic disorders (116).                     | Avoidance (Social Avoidance) | Single-blind randomized controlled trial comparing: VR-CBT (n=58) vs WL (n=58) | 6-months            | ESM; SBQ                           | Immersive VR (Vizard)            |  | Time spent with others did not increase between pre and post-treatment in the VR-CBT group (ESM: pre=0.416±0.26; post=0.404±0.24; $p=.178$ ), but it increased between pre-treatment and follow-up (ESM: follow-up: 0.419±0.24, $p = 0.009$ ). Time spent with others did not increase in the WL group (ESM: pre=0.364±0.27, post=0.323±0.28, follow-up= 0.340±0.30). Compared with the WL group (SBQ: pre=24.1±15, post=23.8±16.5, follow-up=22.5±13.5), use of safety behaviours decreased significantly in the VR-CBT (SBQ: pre=28.8±14.2, post=21.1±16, follow-up=20.2±16.2) group at both post-treatment and follow-up assessment (b interaction=-3.7, $z=-2.93$ , $p=0.0033$ ). |
| Roncero & Perpiñá, 2015 [57]   | 22 years old                         | 1 female                                                 | Adult with bulimia nervosa (1)                             | Avoidance (Food Avoidance)   | Case study                                                                     | No                  | Ad-hoc intra-session questionnaire | Non-immersive VR                 |  | VR had positive effects on eating patterns for the patients, especially for food avoidance from session 1 (10) to session 7 (6) with a complete absence of this symptom (0) at session 6.                                                                                                                                                                                                                                                                                                                                                                                                                                                                                             |
| Rus-Calafell et al., 2014 [58] | 36.50±6.01                           | 7 males and 5 females                                    | Adults with schizophrenia or schizoaffective disorder (12) | Avoidance (Social Avoidance) | Uncontrolled clinical trial                                                    | 4-months            | SADS                               | Immersive VR (Sokitrain program) |  | Social avoidance decreased between pre (SADS=7.75±0.81) and post VR treatment (SADS=4.08±0.41) ( $p=.001$ ), maintaining the result at follow-up (SADS=4.17±0.53, $p < 0.05$ ).                                                                                                                                                                                                                                                                                                                                                                                                                                                                                                       |
| Safir, Wallach                 | 27±n.a.                              | 68 females and 20 males                                  | PSA patients (88).                                         | Avoidance                    | Follow-up of a Randomized                                                      | 12-months follow-up | LSAS                               | Immersive VR                     |  | At follow-up there were no significant differences between CBT (LSAS=15.50±15.43)                                                                                                                                                                                                                                                                                                                                                                                                                                                                                                                                                                                                     |

|                            |                                |                       |                                             |                                  |                                                                                                                     |                                    |                                            |                             |                                                                                                                                                                                                                                                                                                                                                                                                                                                                                                                      |
|----------------------------|--------------------------------|-----------------------|---------------------------------------------|----------------------------------|---------------------------------------------------------------------------------------------------------------------|------------------------------------|--------------------------------------------|-----------------------------|----------------------------------------------------------------------------------------------------------------------------------------------------------------------------------------------------------------------------------------------------------------------------------------------------------------------------------------------------------------------------------------------------------------------------------------------------------------------------------------------------------------------|
| & Bar-Zvi, 2012 [59]       |                                |                       |                                             | (Social Avoidance)               | Clinical Trial comparing: VR-CBT (n=28) vs CBT (n=30) vs WL (=30)                                                   | of Wallach, Safir & Bar-Zvi (2009) |                                            | (Virtual ly Better)         | and VR-CBT (LSAS=14.36±11.37) for avoidance ( $F_{(1, 46)} = 0.45, p = .50$ ). VR-CBT maintained results at follow-up ( $t_{(47)} = 1.52, p = .14$ ).                                                                                                                                                                                                                                                                                                                                                                |
| Shiban et al., 2015 [60]   | 31.14±10.78                    | n.a.                  | Adults with specific phobia (spiders) (32). | Avoidance (Behavioral Avoidance) | Randomized Controlled Clinical Trial comparing: VRET/reactivation group (n=15) vs VRET/no reactivation group (n=17) | 6-months                           | BAT; 7-item ad-hoc follow-up questionnaire | Immersive VR (Cybersession) | Behavioral avoidance decreased in both groups, as it was shown by the time effect ( $F_{(1, 25)} = 11.38, p < .01$ ). No significant difference was found between groups (group*time interaction: $F_{(1, 25)}=.39, p = .54$ ). At the 6-months follow-up both groups reported low levels of avoidance in contact with spiders (VRET/reactivation group: ad-hoc questionnaire=3.18±2.92; VRET/no reactivation group: ad-hoc questionnaire =3.57±2.31), with no significant difference between groups ( $p = 0.71$ ). |
| Wrzesien et al., 2015 [61] | 41.50±17.52                    | 4 females             | Adults with specific phobias (spiders) (4)  | Avoidance (Behavioral Avoidance) | Multiple single-case studies                                                                                        | 3 and 12-months                    | BAT                                        | Immersive VR (P-ARET)       | Behavioral avoidance decreased between pre treatment (BAT=7.75±1.50) and post treatment (BAT=4.50±3.70) ( $Z = -1.826; p = .068$ ), between pre-treatment and 3 months follow-up (BAT=5.75±2.22) ( $Z = -1.826; p = .068$ ), and between pre-treatment and 12 months follow-up (BAT=1.75±2.87) ( $Z = -1.826; p = .068$ ).                                                                                                                                                                                           |
| Emotion Regulation         |                                |                       |                                             |                                  |                                                                                                                     |                                    |                                            |                             |                                                                                                                                                                                                                                                                                                                                                                                                                                                                                                                      |
| Anderson et al., 2017 [62] | 32±12                          | 9 males and 9 females | General Population (18)                     | Emotion Regulation               | Uncontrolled clinical trial                                                                                         | No                                 | Physiological variables (HRV, LF/HF)       | Immersive VR                | Natural VR scenes increased relaxation over other control VR scenes, decreasing stress from beginning (LF/HF: control scene=2.00±1.86; dream beach scene=1.00±0.63; Ireland scene=2.27±1.83) to end (LF/HF: control scene=1.38±1.28, $p < 0.05$ ; dream beach scene= 0.92±0.36, $p < 0.05$ ; Ireland scene=1.88±1.75, $p < 0.05$ ).                                                                                                                                                                                  |
| Bosse et al., 2014 [63]    | 28.2±n.a. (range: 26-32 years) | 6 females and 9 males | General population/healthy adults (15)      | Emotion Regulation;              | Randomized Controlled Trial comparing: choice reaction task (n=5)                                                   | 6-months                           | PLUX wireless sensor device                | Non-Immersive VR (IAPS)     | In the reappraisal group, emotional rating lowered for all images [ $t_{(298)} = 4.342, p < 0.0001$ ] as well as for the negative pictures only [ $t_{(113)} =$                                                                                                                                                                                                                                                                                                                                                      |

|                                          |                                                        |                                                                                     |                                              |                                                                                       |                                                                                       |          |                                   |                                             |                                                                                                                                                                                                                                                                                                                                                                                                                                                                                                                                                                                                                                                                                                                                                                                                                                                                                                                                                                                                                                                                               |
|------------------------------------------|--------------------------------------------------------|-------------------------------------------------------------------------------------|----------------------------------------------|---------------------------------------------------------------------------------------|---------------------------------------------------------------------------------------|----------|-----------------------------------|---------------------------------------------|-------------------------------------------------------------------------------------------------------------------------------------------------------------------------------------------------------------------------------------------------------------------------------------------------------------------------------------------------------------------------------------------------------------------------------------------------------------------------------------------------------------------------------------------------------------------------------------------------------------------------------------------------------------------------------------------------------------------------------------------------------------------------------------------------------------------------------------------------------------------------------------------------------------------------------------------------------------------------------------------------------------------------------------------------------------------------------|
|                                          |                                                        |                                                                                     |                                              | Reappraisal<br>vs reappraisal<br>group (n=5) vs<br>control/no training<br>group (n=5) |                                                                                       |          |                                   |                                             | 1.7808, p = 0.039] post VR task, with results<br>maintained at follow-up.                                                                                                                                                                                                                                                                                                                                                                                                                                                                                                                                                                                                                                                                                                                                                                                                                                                                                                                                                                                                     |
| Hadley et<br>al., 2019<br>[64]           | ER + RP<br>(13±0.91);<br>ER + IVRE<br>(12.9±0.82)      | ER + RP (54%<br>females, 46%<br>males); ER +<br>IVRE (55%<br>females, 45%<br>males) | General<br>population<br>adolescents<br>(88) | Emotion<br>Regulation                                                                 | Randomized<br>Controlled Trial<br>comparing: ER +<br>RP (n=42) vs ER +<br>IVRE (n=46) | 3-months | ADS; DERS                         | Immersive VR                                | Difficulty in Emotional Awareness decreased in<br>both groups between baseline and the 3 months<br>assessment (ER + IVRE: $d=-0.50$ , $p<.05$ ;<br>ER+RP: $d= -0.61$ , $p<.01$ ) with no difference<br>between conditions ( $d =0.09$ , $p = .67$ ).<br>Emotional self-efficacy at the 3-month<br>assessment increased more in the ER+IVRE<br>group ( $d = 0.26$ ; $p =.23$ ) while ER + RP<br>participants only reported minimal improvement<br>( $d = 0.00$ , $p =.91$ ) with a small difference<br>between conditions ( $d =0.20$ , $p = .36$ ).<br>Difficulty Accessing Emotion Regulation<br>Strategies did not change change in the<br>ER+IVRE group and the 3 months assessment<br>but increased in the ER+RP group ( $d =0.71$ , $p$<br>$< .01$ ).<br>The ER+ IVRE group noted a small increase in<br>affect dysregulation ( $d = 0.21$ , $p = .35$ ), while the<br>ER + RP condition reported a small-to-moderate<br>increase in dysregulation at 3 months ( $d = 0.36$ , $p$<br>$= .10$ ) with minimal difference between<br>conditions ( $d = 0.13$ , $p = .59$ ). |
| Navarro-<br>Haro et<br>al., 2016<br>[65] | 32 years old                                           | 1 female                                                                            | Patient with<br>BPD and SUD<br>(1)           | Emotion<br>Regulation                                                                 | Single case study                                                                     | No       | DBT diary<br>card; KIMS-<br>Short | Immersive VR<br>(Mindful<br>River<br>World) | Three VR mindfulness exercises were useful in<br>reducing negative emotions in the patient from<br>session 1 (fear=20 vs 0; anger= 0 vs 0; guilt=40<br>vs 10; disgust= 40 vs 0 and joy=10 vs 30) to<br>session 2 (fear=30 vs 10; anger=20 vs 0;<br>guilt=20 vs 0; shame=20 vs 10; disgust=20 vs 0<br>and joy=30 vs 30).                                                                                                                                                                                                                                                                                                                                                                                                                                                                                                                                                                                                                                                                                                                                                       |
| Navarro-<br>Haro et<br>al., 2019<br>[66] | 45.23±11.23<br>MBI group<br>(45.40±13.74);<br>MBI + VR | 30 females, 9<br>males                                                              | GAD patients<br>(39).                        | Emotion<br>Regulation                                                                 | Randomized<br>Controlled Trial<br>comparing: MBI<br>(n=20) vs<br>MBI+VR (n=19)        | No       | VAS;<br>MAIA;<br>DERS;<br>FFMQ    | Immersive VR<br>(Mindful<br>River<br>World) | MBI+VR achieved significant pre-post<br>improvements in FFMQ-describing internal<br>experiences ( $p=.001$ ), FFMQ-acting with<br>awareness ( $p=.003$ ), DERS-emotional clarity<br>( $p=.014$ ), DERS-impulse control ( $p=.001$ ),                                                                                                                                                                                                                                                                                                                                                                                                                                                                                                                                                                                                                                                                                                                                                                                                                                          |

|                                     |                                                                          |                                                                                                                |                                              |                       |                                                                                         |    |                                                                                           |                  |                                                                                                                                                                                                                                                                                                                                                                                                                                                                                                                                                                                                                                                                                                                                         |                                                                                                                                                                                                                                                                                                                                                                                                                      |
|-------------------------------------|--------------------------------------------------------------------------|----------------------------------------------------------------------------------------------------------------|----------------------------------------------|-----------------------|-----------------------------------------------------------------------------------------|----|-------------------------------------------------------------------------------------------|------------------|-----------------------------------------------------------------------------------------------------------------------------------------------------------------------------------------------------------------------------------------------------------------------------------------------------------------------------------------------------------------------------------------------------------------------------------------------------------------------------------------------------------------------------------------------------------------------------------------------------------------------------------------------------------------------------------------------------------------------------------------|----------------------------------------------------------------------------------------------------------------------------------------------------------------------------------------------------------------------------------------------------------------------------------------------------------------------------------------------------------------------------------------------------------------------|
|                                     | group<br>(45.05±8.17).                                                   | MBI group (15<br>females, 5<br>males);<br>MBI + VR group<br>(15 females, 4<br>males)                           |                                              |                       |                                                                                         |    |                                                                                           |                  |                                                                                                                                                                                                                                                                                                                                                                                                                                                                                                                                                                                                                                                                                                                                         | MAIA-self-regulation (p<.001), MAIA-listening<br>to body (p=.016), with no difference when<br>compared to the MBI group. The MBI+VR<br>group exhibited additional improvements in<br>FFMQ-non-judging inner experiences (p =<br>0.024); and DERS-difficulties concentrating<br>when experiencing negative emotions (p <<br>0.001).<br>The MBI+VR group also showed improvements<br>of relaxation in all VR sessions. |
| Otkhmezu<br>ri et al.,<br>2019 [67] | 21.60±2.96<br>VR-CBM-I<br>(21.05±1.91);<br>standard CBM-I<br>(22.14±3.7) | 23 females, 19<br>males.<br>VR-CBM-I (14<br>females, 7<br>males); standard<br>CBM-I (9<br>females,12<br>males) | General<br>population<br>students (42).      | Emotion<br>regulation | Non-randomized<br>controlled study<br>comparing: CBM-I<br>(n=21) vs VR-<br>CBM-I (n=21) | No | VAS to<br>evaluate<br>emotional<br>responses to<br>a stressor<br>(anxiety and<br>sadness) | Immersi<br>ve VR | The VR-CBM-I group reported a greater<br>reduction in the emotional response to the<br>stressor (assessed by the VAS Anxiety)<br>compared to the CBM-I group with a significant<br>group ( $F_{(1,40)}=15.4$ , p<.001) and time*group<br>( $F_{(1,40)}=5.2$ , p=.03) effect. In particular, the stress<br>task resulted in a significant increase in anxiety<br>in the CBM-I group ( $t_{20}=-3.3$ , p=.003, $d=0.72$ ),<br>but not in the VR-CBM-I training ( $t_{20}=-1.4$ ,<br>p=.18, $d=0.31$ ).<br>The VR-CBM-I also reported less levels of<br>sadness after the stress task than the CBM-I<br>group (group effect: $F_{(1,40)}=12.2$ , p=.001), but the<br>time*group effect was not significant ( $F_{(1,40)}=2.7$ ,<br>p=.09). |                                                                                                                                                                                                                                                                                                                                                                                                                      |
| Wrzesien<br>et al.,<br>2015 [68]    | 13.27±0.47<br>VRN group<br>(13.27±0.47);<br>VRS group<br>(13.17±0.39)    | 11 males, 11<br>females                                                                                        | General<br>population<br>adolescents<br>(22) | Emotion<br>Regulation | Randomized<br>controlled trial<br>comparing: VRS<br>vs VRN group                        | No | VAS; SAM                                                                                  | Immersi<br>ve VR | VAS scores showed that both group experienced<br>an increase in relaxation following the emotion<br>regulation phase of the test ( $F_{(2, 42)} = 3.957$ , p =<br>0.027), with no significant group ( $F_{(1, 21)} = 1.710$ ,<br>p = 0.20) or phase*group effect ( $F_{(2, 42)} = 0.793$ ,<br>p = 0.45). However, pairwise comparisons<br>showed that relaxation increased significantly<br>after the regulation phase in the VRS group<br>especially (p=.011).<br>SAM showed that calm increased in both groups<br>between baseline and after the regulation phase<br>(p = 0.026 for both groups). There was also a<br>significant decrease in the arousal dimension                                                                   |                                                                                                                                                                                                                                                                                                                                                                                                                      |



|                              |                                                                                          |                                                                                             |                                                                                                                                                |                    |                                                                            |          |                                                       |                         |                                                                                                                                                                                                                                                                                                                                                                                                                                                                                                                                                                   |
|------------------------------|------------------------------------------------------------------------------------------|---------------------------------------------------------------------------------------------|------------------------------------------------------------------------------------------------------------------------------------------------|--------------------|----------------------------------------------------------------------------|----------|-------------------------------------------------------|-------------------------|-------------------------------------------------------------------------------------------------------------------------------------------------------------------------------------------------------------------------------------------------------------------------------------------------------------------------------------------------------------------------------------------------------------------------------------------------------------------------------------------------------------------------------------------------------------------|
|                              |                                                                                          |                                                                                             |                                                                                                                                                |                    |                                                                            |          |                                                       |                         | after the regulation phase in the VRS group ( $p = 0.011$ ).                                                                                                                                                                                                                                                                                                                                                                                                                                                                                                      |
| Yuan & Ip, 2018 [69]         | 106.3±13.5 months<br>VR training group (107.6±13.27 months);<br>WL (104.8±13.83 months). | 64 males, 8 females<br>VR training group (31 males, 5 females);<br>WL (33 males, 3 females) | Children with autism spectrum disorders (72)                                                                                                   | Emotion Regulation | Non-randomized controlled study comparing: VR training (n=36) vs WL (n=36) | No       | PEP-3                                                 | CAVE                    | Children that underwent VR training obtained an improvement in emotion expression and regulation (pre=18.9±3.57, post=20.2±3.00, $p = .037$ ) and in social interaction and adaptation (pre=20.2±3.43, post=21.8±2.99, $p < .0005$ ).<br>Finally, a statistically significant interaction between group and time on affective expressions ( $F_{(1, 70)} = 5.223$ , $p = .025$ , <i>partial</i> $\eta^2 = .069$ ) and on social reciprocity ( $F_{(1, 70)} = 7.769$ , $p = .007$ , <i>partial</i> $\eta^2 = .100$ ) was found in favour of the VR training group. |
| <b>Impulsivity</b>           |                                                                                          |                                                                                             |                                                                                                                                                |                    |                                                                            |          |                                                       |                         |                                                                                                                                                                                                                                                                                                                                                                                                                                                                                                                                                                   |
| Laforest et al., 2016 [73]   | n.a. (2 adults in their mid-20s, 1 adult in her mid-30s)                                 | 3 females                                                                                   | Adults with OCD (3)                                                                                                                            | Impulsivity        | Case studies                                                               | 8-months | Self-monitoring of obsessions and compulsions ; YBOCS | CAVE                    | VR intervention improved OCD symptoms (impulsive thoughts and compulsive behaviours) for all three participants, as it can be seen by the YBOCS results (patient 1: pre =22, post = 14, 4 months f-u = 16, 8 months f-u = 21; patient 2: pre = 31, post = 14, 4 months f-u = 11, 8 months f-u =11; patient 3 pre = 30, post = 21, 4 months f-u = 23, 8 months f-u = 27).                                                                                                                                                                                          |
| <b>Cognitive Reappraisal</b> |                                                                                          |                                                                                             |                                                                                                                                                |                    |                                                                            |          |                                                       |                         |                                                                                                                                                                                                                                                                                                                                                                                                                                                                                                                                                                   |
| Falconer et al., 2019 [74]   | 12 and 15 years old                                                                      | 2 males                                                                                     | 1 participant with acute anxiety and posttraumatic flashbacks due to medical treatments;<br>1 participant with suicidal thoughts and low mood. | Reappraisal        | Case studies                                                               | No       | n.a.                                                  | Non-Immersive (ProReal) | Both participants were able to better express their emotions, reappraise their experience, and learn perspective taking through the VR visualization.                                                                                                                                                                                                                                                                                                                                                                                                             |
| <b>Aggression</b>            |                                                                                          |                                                                                             |                                                                                                                                                |                    |                                                                            |          |                                                       |                         |                                                                                                                                                                                                                                                                                                                                                                                                                                                                                                                                                                   |
| Jo et al., 2022 [70]         | High Aggression                                                                          | 60 males                                                                                    | General population with                                                                                                                        | Aggression         | Non-Randomized Controlled Trial                                            | No       | STAXI                                                 | Immersive VR            | VR Anger Exposure Training was effective in teaching participants with low and high levels of                                                                                                                                                                                                                                                                                                                                                                                                                                                                     |

|                                         |                                           |         |  |                                                                  |  |                                                                                   |                                    |                                                                                               |                       |                                                                  |                                                           |  |  |                                                                                                                                                                                                                                                                                                                                                                                                                                                                                                                                                                                                                                                                                                                                              |
|-----------------------------------------|-------------------------------------------|---------|--|------------------------------------------------------------------|--|-----------------------------------------------------------------------------------|------------------------------------|-----------------------------------------------------------------------------------------------|-----------------------|------------------------------------------------------------------|-----------------------------------------------------------|--|--|----------------------------------------------------------------------------------------------------------------------------------------------------------------------------------------------------------------------------------------------------------------------------------------------------------------------------------------------------------------------------------------------------------------------------------------------------------------------------------------------------------------------------------------------------------------------------------------------------------------------------------------------------------------------------------------------------------------------------------------------|
|                                         |                                           |         |  | Group<br>(23.9±2.5);<br>Low<br>Aggression<br>group<br>(24.1±2.6) |  | high and low<br>levels of<br>aggression (60)                                      |                                    | comparing: people<br>with high (n=30)<br>and low levels of<br>aggression (n=30)               |                       |                                                                  |                                                           |  |  | aggression to manage anger expression. In particular, participants' levels of anger decreased after managed expression both when in the VR scenario "conflict with a friend" (high aggression group: $t_{(29)} = 8.78$ , $p < 0.001$ ; low aggression group: $t_{(29)} = 9.90$ , $p < 0.001$ ) and in the VR scenario "conflict with a stranger" (high aggression group: $t_{(29)} = 9.90$ , $p < 0.001$ ; low aggression group: $t_{(29)} = 11.11$ , $p < 0.001$ ) with no significant difference between groups.                                                                                                                                                                                                                           |
| Klein<br>Tunkte et<br>al., 2020<br>[71] | VRAPT<br>(39.4±10.6)<br>WL<br>(38.0±10.0) | n.a.    |  |                                                                  |  | Forensic<br>patients (128)                                                        | Aggressio<br>n;<br>Impulsivit<br>y | Multicentered<br>randomized<br>controlled trial<br>comparing:<br>VRAPT (n=58) vs<br>WL (n=64) | 3 months<br>follow-up | SDAS;<br>AVL; BIS-<br>11; BDHI-<br>D; NAS-PI;<br>STAXI-2;<br>RPQ | Immersi<br>ve VR                                          |  |  | Self-reported aggression decreased both in the VRAPT and WL group between pre and post-treatment ( $F_{(1,91)}=101.04$ , $p = 0.17$ ) and between pre-treatment and 3 months follow-up ( $F_{(1,44)}=100.42$ , $p = 0.23$ ), but there was no difference between groups. Staff-rated aggression did not change significantly between pre and post-treatment in any of the groups. VRAPT obtained better results than WL in aggression and hostility (BDHI-D total; $p=.02$ ), direct aggression (BDHI-D subscale; $p=.04$ ), non-planning impulsiveness (BIS-11 subscale; $p=.04$ ), anger control (STAXI-2 subscale; $p=.02$ ), and anger expression (STAXI-2 subscale; $p=.03$ ), but no treatment effect was found at 3-months follow-up. |
| Zinzow et<br>al., 2018<br>[72]          | n.a.                                      | 8 males |  |                                                                  |  | Veterans with<br>PTSD,<br>driving anxiety<br>and/or<br>aggression<br>problems (8) | Aggressio<br>n                     | Uncontrolled<br>clinical trial                                                                | 1-month               | DBS                                                              | Non-<br>Immersi<br>ve<br>(DriveS<br>afety<br>CDS-<br>250) |  |  | Even though participants did not feel the simulation as realistic, VRET+CBT lowered their levels of hostile/aggressive behavior while driving between pre and post-treatment (DBS subscale: pre= $3.71 \pm 1.18$ , post = $1.81 \pm 0.99$ , $p < 0.01$ ), with the maintenance of results at 1-month follow-up ( $=1.64 \pm 0.62$ ).                                                                                                                                                                                                                                                                                                                                                                                                         |

**Abbreviations.** ADS = Affect and Disregulation Scale; AFQ-Y = Avoidance and Fusion Questionnaire for Youth; A-IAT = The Alcohol Approach-Avoidance Implicit Association Test; ASD = Acute Stress Disorder; AVL = Aggression Questionnaire; BAT = Behavioral Assessment Task; BDHI-D = Buss-Durkee Hostility Inventory-Dutch; BIS-11 = Barratt Impulsivness Scale; BPD = Borderline Personality Disorder; CAPS = Clinician Administered PTSD Scale for DSM-IV; CAREN = Computer Assisted

Rehabilitation Environment; CAVE= Cave Automatic Virtual Environment; CBM-I = Cognitive Bias Modification of Interpretations; CBT = Cognitive Behavioral Therapy; DBS = Driving Behavior Survey; DBT = Dialectical Behavioral Therapy; DERS = Difficulties in Emotion Regulation Scale; ER = Emotion Regulation; ESM = The experience sampling method; FFMQ = Five facets of mindfulness questionnaire; FSQ = Fear of Spiders Questionnaire; F-U = Follow Up; GAD = General anxiety disorder; HRV = Heart rate variability; IAPS = International Affective Picture System; iVET = In Vivo Exposure Therapy; IVRE = Immersive Virtual Reality Environments; KIMS-Short = Kentucky Inventory of Mindfulness Skills; LSAS = Liebowitz social anxiety scale; LSAS-SR = Liebowitz social anxiety scale Self-Reported; MAIA = Multidimensional assessment of interoceptive awareness; MBI = Mindfulness Based Intervention; NAS-PI = Novaco Anger Scale and Provocation Inventory; O- AS = Agoraphobic Avoidance Scale; O-BAT = Agoraphobic Behavioral Assessment Task; OCD = Obsessive Compulsive Disorder; OST = One-session treatment; P-ARET = Projection-based augmented reality exposure therapy; PEP - 3 = Psychoeducational Profile, Third Edition; PSA = Public speaking anxiety; PSS = Post-traumatic Stress Symptom Scale; PTSD = Post-traumatic Stress Disorder; RP = Role Plays; RPQ = Reactive-Proactive Questionnaire; SADS = Social avoidance and distress scale; SAS = Spider Anxiety Screening; SBQ = Safety Behaviour Questionnaire-Persecutory Delusions; SDAS = Social Dysfunction and Aggression Scale; STAXI-2 = State-Trait Anger Expression Inventory 2; SUDs = Subject Units of Distress; VAS = Visual Analogue Scale; VAAAT = Virtual Alcohol Approach-Avoidance Training Task; VR = Virtual Reality; VR-CBT = Virtual Reality Cognitive Behavioral Therapy; VRAPT = Virtual Reality Aggression Prevention Therapy; VRE = Virtual Reality Exposure; VRET = Virtual Reality Exposure Therapy; VR= Virtual Reality; VR-CBM-I = virtual reality Cognitive Bias Modification of Interpretations; VRS = avatar that looks like the self; VRN = neutral avatar; WL = Waiting List; YBOCS = Yale-Brown Obsessive Compulsive Scale.

**Supplementary Table S2.** Quality assessment and risk of bias criteria for observational cohort, case-control, and controlled intervention studies.

| CRITERIA                                                                                                 | STRONG                                                                                                                                                                                   | MODERATE                                                                                                                                                                                                                                                       | WEAK                                         |
|----------------------------------------------------------------------------------------------------------|------------------------------------------------------------------------------------------------------------------------------------------------------------------------------------------|----------------------------------------------------------------------------------------------------------------------------------------------------------------------------------------------------------------------------------------------------------------|----------------------------------------------|
| <i>Research Design</i>                                                                                   | Randomized Control Trial or experimental study                                                                                                                                           | Observational cohort or case-control studies                                                                                                                                                                                                                   | Uncontrolled studies                         |
| <i>Was the research objective clearly stated and directly related to review topic?</i>                   | Clear description of objective. Outcome measures directly related to topic                                                                                                               | Moderately clear, some details missing. Some outcome measures related to topic                                                                                                                                                                                 | Unclear or not stated                        |
| <i>Was the study population clearly defined with inclusion/exclusion criteria stated and consistent?</i> | Clear description of population and inclusion/exclusion criteria                                                                                                                         | Moderately clear, some details missing                                                                                                                                                                                                                         | Unclear or not stated                        |
| <i>Comparator: were the subjects selected from a comparable population in all respects?</i>              | Participants were comparable in at least: Diagnosis, age, weight, BMI, severity of disease, timeframe of treatment, similar duration of illness, and number of previous hospitalizations | Participants were comparable in at least three between: Age, sex, schooling, ethnicity, marital status, BMI, diagnosis. Some differences reported in timeframe of treatment, severity of disease, duration of illness, or number of previous hospitalizations. | No comparator group or unclear or not stated |
| <i>Sample size</i>                                                                                       | >100                                                                                                                                                                                     | 50-99                                                                                                                                                                                                                                                          | <50                                          |
| <i>Was the follow-up timeframe sufficient?</i>                                                           | 1 year or greater follow-up                                                                                                                                                              | 3 months to 11 months follow-up                                                                                                                                                                                                                                | < 3 months follow-up                         |
| <i>Was treatment thoroughly described?</i>                                                               | Clear description of regimen and formula                                                                                                                                                 | Moderately clear, some details missing                                                                                                                                                                                                                         | Unclear or not stated                        |

|                                                                                                                                                                      |                                                                                |                                                                                 |                                                        |
|----------------------------------------------------------------------------------------------------------------------------------------------------------------------|--------------------------------------------------------------------------------|---------------------------------------------------------------------------------|--------------------------------------------------------|
| <i>For outcomes that can vary, did the study clearly define different levels of the outcome?</i>                                                                     | Clear description, different levels of outcomes reported                       | Moderately clear description of the different levels of outcomes                | No alternate level of outcome reported                 |
| <i>Data Collection Method: scale, methods to collect data</i>                                                                                                        | Tools are valid and reliable                                                   | Tools are valid but reliability not described                                   | No evidence of validity or reliability or not stated   |
| <i>Measurement Bias: Were the outcome measures clearly defined, valid, reliable and implemented consistently?</i>                                                    | Valid, reliable, and explained in detail                                       | Measurement valid but reliability not described                                 | Self-reported by participants or not stated or unclear |
| <i>Selection Bias: Is study sample representative of target population and if &lt;100% eligible cases were selected, were they randomized?</i>                       | Very likely to be representative of target population, >80% participation rate | Somewhat likely to be representative of target population, 60-79% participation | < 60% participation rate or not stated                 |
| <i>Attrition Bias: Was loss to follow-up after baseline minimized?</i>                                                                                               | >80% follow-up after baseline                                                  | 60-79% follow-up after baseline and explanation of those lost                   | < 60% follow-up after baseline or not reported         |
| <i>Confounders: Were key potential confounding variables measured and adjusted statistically for their impact on the relationship between treatment and outcome?</i> | Confounders identified, discussed, and adjusted for statistically              | Confounders identified and discussed                                            | Unclear or not stated                                  |

Format modified from National Institutes of Health (2021) [38].

**Supplementary Table S3.** Assessment of quality and risk of bias of selected experimental studies [38].

| <b>Criteria</b>                                                                                          | <b>Anderson et al., 2017 [62]</b> | <b>Bosse et al., 2014 [63]</b> | <b>Bouchard et al., 2017 [39]</b> | <b>Cárdenas-López et al., 2014 [40]</b> | <b>Freeman et al., 2022 [43]</b> | <b>Gujjar et al., 2018 [44]</b> | <b>Gujjar et al., 2019 [45]</b> | <b>Hadley et al., 2019 [64]</b> |
|----------------------------------------------------------------------------------------------------------|-----------------------------------|--------------------------------|-----------------------------------|-----------------------------------------|----------------------------------|---------------------------------|---------------------------------|---------------------------------|
| <i>Research Design</i>                                                                                   | M                                 | M                              | S                                 | M                                       | S                                | M                               | S                               | S                               |
| <i>Was the research objective clearly stated and directly related to review topic?</i>                   | S                                 | S                              | S                                 | M                                       | S                                | S                               | S                               | S                               |
| <i>Was the study population clearly defined with inclusion/exclusion criteria stated and consistent?</i> | M                                 | W                              | S                                 | W                                       | S                                | S                               | S                               | S                               |
| <i>Comparator: were the subjects selected from a comparable population in all respects?</i>              | W                                 | W                              | S                                 | W                                       | S                                | M                               | M                               | S                               |
| <i>Sample size</i>                                                                                       | W                                 | W                              | M                                 | W                                       | S                                | W                               | W                               | M                               |

|                                                                                                                                                                      |                             |                                  |                                   |                                      |                                 |                              |                                               |                                               |
|----------------------------------------------------------------------------------------------------------------------------------------------------------------------|-----------------------------|----------------------------------|-----------------------------------|--------------------------------------|---------------------------------|------------------------------|-----------------------------------------------|-----------------------------------------------|
| <i>Was the follow-up timeframe sufficient?</i>                                                                                                                       | W                           | M                                | M                                 | N/A                                  | M                               | M                            | M                                             | M                                             |
| <i>Was treatment thoroughly described?</i>                                                                                                                           | S                           | S                                | S                                 | S                                    | S                               | M                            | S                                             | M                                             |
| <i>For outcomes that can vary, did the study clearly define different levels of the outcome?</i>                                                                     | S                           | S                                | S                                 | S                                    | S                               | M                            | S                                             | S                                             |
| <i>Data Collection Method: scale, methods to collect data</i>                                                                                                        | M                           | W                                | M                                 | S                                    | M                               | M                            | M                                             | M                                             |
| <i>Measurement Bias: Were the outcome measures clearly defined, valid, reliable and implemented consistently?</i>                                                    | M                           | W                                | M                                 | S                                    | M                               | M                            | M                                             | S                                             |
| <i>Selection Bias: Is study sample representative of target population and if &lt;100% eligible cases were selected, were they randomized?</i>                       | N/A                         | S                                | S                                 | W                                    | S                               | S                            | S                                             | S                                             |
| <i>Attrition Bias: Was loss to follow-up after baseline minimized?</i>                                                                                               | N/A                         | S                                | M                                 | N/A                                  | S                               | S                            | S                                             | S                                             |
| <i>Confounders: Were key potential confounding variables measured and adjusted statistically for their impact on the relationship between treatment and outcome?</i> | S                           | W                                | S                                 | W                                    | S                               | W                            | S                                             | S                                             |
| <b>Total Points</b>                                                                                                                                                  | 23                          | 25                               | 34                                | 21                                   | 36                              | 30                           | 32                                            | 33                                            |
| <b>Overall Score</b>                                                                                                                                                 | W                           | W                                | S                                 | W                                    | S                               | M                            | S                                             | S                                             |
| <b>Criteria</b>                                                                                                                                                      | <b>Jo et al., 2022 [70]</b> | <b>Kampman et al., 2016 [46]</b> | <b>Kaussner et al., 2020 [47]</b> | <b>Klein Tunte et al., 2020 [71]</b> | <b>Kim &amp; Lee, 2019 [48]</b> | <b>Kim et al., 2020 [49]</b> | <b>Malbos, Rapee &amp; Kavakli, 2011 [50]</b> | <b>Malbos, Rapee &amp; Kavakli, 2013 [51]</b> |
| <i>Research Design</i>                                                                                                                                               | M                           | S                                | M                                 | S                                    | M                               | M                            | M                                             | M                                             |
| <i>Was the research objective clearly stated and directly related to review topic?</i>                                                                               | S                           | S                                | S                                 | S                                    | S                               | S                            | S                                             | S                                             |

|                                                                                                                                                                      |     |    |    |    |     |    |     |    |
|----------------------------------------------------------------------------------------------------------------------------------------------------------------------|-----|----|----|----|-----|----|-----|----|
| <i>Was the study population clearly defined with inclusion/exclusion criteria stated and consistent?</i>                                                             | M   | S  | S  | S  | M   | S  | M   | S  |
| <i>Comparator: were the subjects selected from a comparable population in all respects?</i>                                                                          | S   | S  | M  | M  | M   | S  | S   | S  |
| <i>Sample size</i>                                                                                                                                                   | M   | M  | W  | S  | W   | M  | W   | W  |
| <i>Was the follow-up timeframe sufficient?</i>                                                                                                                       | N/A | M  | W  | M  | N/A | W  | N/A | M  |
| <i>Was treatment thoroughly described?</i>                                                                                                                           | S   | S  | S  | S  | S   | S  | S   | S  |
| <i>For outcomes that can vary, did the study clearly define different levels of the outcome?</i>                                                                     | S   | S  | M  | S  | S   | S  | M   | S  |
| <i>Data Collection Method: scale, methods to collect data</i>                                                                                                        | M   | S  | M  | S  | S   | M  | S   | S  |
| <i>Measurement Bias: Were the outcome measures clearly defined, valid, reliable and implemented consistently?</i>                                                    | S   | S  | M  | S  | S   | M  | S   | S  |
| <i>Selection Bias: Is study sample representative of target population and if &lt;100% eligible cases were selected, were they randomized?</i>                       | S   | S  | M  | S  | S   | M  | N/A | S  |
| <i>Attrition Bias: Was loss to follow-up after baseline minimized?</i>                                                                                               | N/A | M  | S  | S  | N/A | W  | N/A | S  |
| <i>Confounders: Were key potential confounding variables measured and adjusted statistically for their impact on the relationship between treatment and outcome?</i> | S   | S  | M  | S  | M   | S  | W   | S  |
| <b>Total Points</b>                                                                                                                                                  | 29  | 36 | 28 | 37 | 27  | 30 | 21  | 35 |
| <b>Overall Score</b>                                                                                                                                                 | M   | S  | M  | S  | M   | M  | W   | S  |

| Criteria                                                                                                                                       | Maples-Keller et al., 2017 [52] | Meyerbroeker et al., 2013 [53] | Michaliszyn et al., 2010 [54] | Miloff et al., 2019 [55] | Navarro-Haro et al., 2019 [66] | Otkhmezuri et al., 2019 [67] | Pot-Kolder et al., 2018 [56] | Rus-Calafell et al., 2014 [58] |
|------------------------------------------------------------------------------------------------------------------------------------------------|---------------------------------|--------------------------------|-------------------------------|--------------------------|--------------------------------|------------------------------|------------------------------|--------------------------------|
| <i>Research Design</i>                                                                                                                         | M                               | S                              | S                             | S                        | M                              | M                            | S                            | M                              |
| <i>Was the research objective clearly stated and directly related to review topic?</i>                                                         | S                               | S                              | S                             | S                        | S                              | S                            | S                            | S                              |
| <i>Was the study population clearly defined with inclusion/exclusion criteria stated and consistent?</i>                                       | S                               | S                              | S                             | S                        | S                              | M                            | S                            | S                              |
| <i>Comparator: were the subjects selected from a comparable population in all respects?</i>                                                    | S                               | S                              | S                             | S                        | M                              | S                            | S                            | S                              |
| <i>Sample size</i>                                                                                                                             | S                               | M                              | M                             | S                        | W                              | W                            | S                            | W                              |
| <i>Was the follow-up timeframe sufficient?</i>                                                                                                 | N/A                             | N/A                            | M                             | S                        | N/A                            | N/A                          | M                            | W                              |
| <i>Was treatment thoroughly described?</i>                                                                                                     | S                               | S                              | S                             | S                        | S                              | S                            | S                            | S                              |
| <i>For outcomes that can vary, did the study clearly define different levels of the outcome?</i>                                               | S                               | S                              | S                             | S                        | S                              | S                            | S                            | S                              |
| <i>Data Collection Method: scale, methods to collect data</i>                                                                                  | M                               | S                              | S                             | S                        | S                              | M                            | M                            | S                              |
| <i>Measurement Bias: Were the outcome measures clearly defined, valid, reliable and implemented consistently?</i>                              | M                               | S                              | S                             | S                        | S                              | M                            | M                            | S                              |
| <i>Selection Bias: Is study sample representative of target population and if &lt;100% eligible cases were selected, were they randomized?</i> | S                               | S                              | S                             | S                        | S                              | N/A                          | S                            | N/A                            |

| <i>Attrition Bias: Was loss to follow-up after baseline minimized?</i>                                                                                               | N/A                            | W                               | S                                 | S                               | N/A                             | N/A | S  | S  |
|----------------------------------------------------------------------------------------------------------------------------------------------------------------------|--------------------------------|---------------------------------|-----------------------------------|---------------------------------|---------------------------------|-----|----|----|
| <i>Confounders: Were key potential confounding variables measured and adjusted statistically for their impact on the relationship between treatment and outcome?</i> | S                              | S                               | S                                 | S                               | S                               | S   | S  | S  |
| <b>Total Points</b>                                                                                                                                                  | 30                             | 33                              | 37                                | 39                              | 29                              | 24  | 36 | 31 |
| <b>Overall Score</b>                                                                                                                                                 | M                              | S                               | S                                 | S                               | M                               | W   | S  | S  |
| <b>Criteria</b>                                                                                                                                                      | <b>Safir et al., 2012 [59]</b> | <b>Shiban et al., 2015 [60]</b> | <b>Wrzesien et al., 2015 [68]</b> | <b>Yuan &amp; Ip, 2018 [69]</b> | <b>Zinzow et al., 2018 [72]</b> |     |    |    |
| <i>Research Design</i>                                                                                                                                               | M                              | S                               | M                                 | M                               | M                               |     |    |    |
| <i>Was the research objective clearly stated and directly related to review topic?</i>                                                                               | S                              | S                               | S                                 | S                               | S                               |     |    |    |
| <i>Was the study population clearly defined with inclusion/exclusion criteria stated and consistent?</i>                                                             | S                              | S                               | W                                 | S                               | S                               |     |    |    |
| <i>Comparator: were the subjects selected from a comparable population in all respects?</i>                                                                          | S                              | M                               | W                                 | S                               | S                               |     |    |    |
| <i>Sample size</i>                                                                                                                                                   | W                              | W                               | W                                 | M                               | W                               |     |    |    |
| <i>Was the follow-up timeframe sufficient?</i>                                                                                                                       | S                              | M                               | N/A                               | N/A                             | W                               |     |    |    |
| <i>Was treatment thoroughly described?</i>                                                                                                                           | S                              | S                               | S                                 | S                               | S                               |     |    |    |
| <i>For outcomes that can vary, did the study clearly define different levels of the outcome?</i>                                                                     | S                              | S                               | S                                 | S                               | S                               |     |    |    |
| <i>Data Collection Method: scale, methods to collect data</i>                                                                                                        | S                              | S                               | S                                 | N/A                             | S                               |     |    |    |



|                                                                                                                                                                      |    |    |     |     |     |
|----------------------------------------------------------------------------------------------------------------------------------------------------------------------|----|----|-----|-----|-----|
| <i>Measurement Bias: Were the outcome measures clearly defined, valid, reliable and implemented consistently?</i>                                                    | S  | S  | S   | N/A | S   |
| <i>Selection Bias: Is study sample representative of target population and if &lt;100% eligible cases were selected, were they randomized?</i>                       | S  | S  | S   | N/A | N/A |
| <i>Attrition Bias: Was loss to follow-up afterbaseline minimized?</i>                                                                                                | S  | M  | N/A | N/A | S   |
| <i>Confounders: Were key potential confounding variables measured and adjusted statistically for their impact on the relationship between treatment and outcome?</i> | S  | S  | S   | S   | S   |
| <b>Total Points</b>                                                                                                                                                  | 36 | 34 | 26  | 21  | 31  |
| <b>Overall Score</b>                                                                                                                                                 | S  | S  | M   | W   | S   |

**Abbreviations.** W = weak, M = moderate, S = strong, N/A = not applicable.
